# Supplementary material for: Trajectories of perinatal depression among women living with HIV in Uganda
Source: PubMed Central journal article supplement (PMC11413615; doi:10.7189/jogh.14.04147), 2024-09-20
Supplement: jogh-14-04147-s001.pdf [file jogh-14-04147-s001.pdf]

## ONLINE SUPPLEMENTARY MATERIALS

**Table S1. Multivariable Multinomial Regression Results, Treatment Group**

| Variable Name                                      | Latent Class 2 vs. Latent Class 1 |             | Latent Class 3 vs. Latent Class 1 |              |
|----------------------------------------------------|-----------------------------------|-------------|-----------------------------------|--------------|
|                                                    | Coefficient (SE)                  | 95 CI       | Coefficient (SE)                  | 95 CI        |
| <i>Experienced Intimate Partner Violence (IPV)</i> |                                   |             |                                   |              |
| Sum of IPV types                                   | 0.08 (0.44)                       | -0.77, 0.94 | -1.18 (0.80)                      | -2.75, 0.38  |
| Controlling IPV                                    | 0.27 (0.60)                       | -0.92, 1.45 | 2.13 (1.18)                       | -0.17, 4.43  |
| Physical IPV                                       | -0.32 (0.59)                      | -1.48, 0.85 | 2.29* (1.09)                      | 0.16, 4.41   |
| <i>Problem Solving Orientation</i>                 |                                   |             |                                   |              |
| Negative Orientation                               | 0.04 (0.07)                       | -0.10, 0.18 | 0.03 (0.14)                       | -0.24, 0.30  |
| Positive Orientation                               | 0.12 (0.07)                       | -0.03, 0.26 | -0.16 (0.12)                      | -0.41, 0.08  |
| Avoidant Orientation                               | 0.08 (0.06)                       | -0.04, 0.19 | -0.08 (0.13)                      | -0.34, 0.17  |
| <i>Partner Support</i>                             |                                   |             |                                   |              |
| Pregnancy Support                                  | 0.03 (0.36)                       | -0.66, 0.73 | -1.37 (0.76)                      | -2.87, 0.12  |
| Antenatal Care Support                             | 0.02 (0.14)                       | -0.26, 0.30 | -0.19 (0.25)                      | -0.68, 0.29  |
| <i>General Support</i>                             |                                   |             |                                   |              |
| Social Support                                     | 0.22 (0.56)                       | -0.88, 1.33 | 2.56 (1.29)                       | 0.03, 5.09   |
| <i>Trauma</i>                                      |                                   |             |                                   |              |
| Any Recent Trauma                                  | 1.98 (1.39)                       | -0.75, 4.71 | 1.57 (2.57)                       | -3.47, 6.60  |
| Number of Recent Traumas                           | -0.03 (0.17)                      | -0.36, 0.31 | -0.31 (0.29)                      | -0.87, 0.25  |
| Any Childhood Trauma                               | 2.20 (1.31)                       | -0.37, 4.78 | 3.95 (2.33)                       | -0.61, 8.51  |
| <i>PMTCT</i>                                       |                                   |             |                                   |              |
| PMTCT Knowledge                                    | 0.07 (0.24)                       | -0.39, 0.54 | -0.02 (0.4)                       | -0.80, 0.76  |
| PMTCT Attitudes                                    | 0.88 (0.78)                       | -0.65, 2.41 | -2.21* (0.90)                     | -3.97, -0.44 |
| <i>Health</i>                                      |                                   |             |                                   |              |
| Health-Related Quality of Life                     | -0.12** (0.04)                    | -0.19, 0.05 | -0.22** (0.08)                    | -0.38, -0.07 |
| <i>Stigma</i>                                      |                                   |             |                                   |              |
| HIV-Related Stigma                                 | -0.03 (0.34)                      | -0.70, 0.63 | -0.43 (0.57)                      | -1.54, 0.69  |

**Notes:** Class 1: Mildly depressed – improvers (MiD-I); Class 2: Moderately depressed – improvers (MoD-I); Class 3: Moderately depressed – remains depressed (MoD-R); 95% CI: 95% confidence interval. Note: all measures assessed at baseline. \*p<0.05; \*\*p<0.01; \*\*\*p<0.001.

**Table S2. Multivariable Multinomial Regression Results, Comparison Group**

| Variable Name                                      | Latent Class 2 vs. Latent Class 1 |              | Latent Class 3 vs. Latent Class 1 |              |
|----------------------------------------------------|-----------------------------------|--------------|-----------------------------------|--------------|
|                                                    | Coefficient (SE)                  | 95 CI        | Coefficient (SE)                  | 95 CI        |
| <i>Experienced Intimate Partner Violence (IPV)</i> |                                   |              |                                   |              |
| Sum of IPV types                                   | 0.49 (0.41)                       | -0.31, 1.29  | 0.33 (0.50)                       | -0.66, 1.31  |
| Controlling IPV                                    | -0.31 (0.58)                      | -1.44, 0.83  | -0.29 (0.70)                      | -1.66, 1.08  |
| Physical IPV                                       | -1.05 (0.58)                      | -2.18, 0.08  | -0.47 (0.68)                      | -1.81, 0.87  |
| <i>Problem Solving Orientation</i>                 |                                   |              |                                   |              |
| Negative Orientation                               | 0.11 (0.07)                       | -0.02, 0.25  | 0.21** (0.08)                     | 0.04, 0.38   |
| Positive Orientation                               | 0.05 (0.07)                       | -0.08, 0.18  | -0.08 (0.08)                      | -0.24, 0.08  |
| Avoidant Orientation                               | 0.00 (0.05)                       | -0.10, 0.10  | 0.07 (0.07)                       | -0.07, 0.20  |
| <i>Partner Support</i>                             |                                   |              |                                   |              |
| Pregnancy Support                                  | -0.01 (0.40)                      | -0.79, 0.78  | -0.15 (0.50)                      | -1.12, 0.83  |
| Antenatal Care Support                             | 0.13 (0.13)                       | -0.13, 0.40  | -0.06 (0.17)                      | -0.39, 0.26  |
| <i>General Support</i>                             |                                   |              |                                   |              |
| Social Support                                     | -0.17 (0.43)                      | -1.02, 0.68  | 0.16 (0.54)                       | -0.90, 1.22  |
| <i>Trauma</i>                                      |                                   |              |                                   |              |
| Any Recent Trauma                                  | 0.22 (0.95)                       | -1.64, 2.07  | 0.53 (1.17)                       | -1.7, 2.83   |
| Number of Recent Traumas                           | 0.00 (0.15)                       | -0.29, 0.29  | 0.05 (0.15)                       | -0.25, 0.36  |
| Any Childhood Trauma                               | 0.19 (0.78)                       | -1.34, 1.72  | 0.29 (1.07)                       | -1.81, 2.39  |
| <i>PMTCT</i>                                       |                                   |              |                                   |              |
| PMTCT Knowledge                                    | -0.68** (0.23)                    | -1.13, -0.28 | -0.92** (0.28)                    | -1.47, -0.37 |
| PMTCT Attitudes                                    | 2.15** (0.81)                     | 0.56, 3.74   | -0.78 (1.27)                      | -3.27, 1.70  |
| <i>Health</i>                                      |                                   |              |                                   |              |
| Health-Related Quality of Life                     | -0.14*** (0.03)                   | -0.20, -0.08 | -0.20*** (0.04)                   | -0.28, -0.13 |
| <i>Stigma</i>                                      |                                   |              |                                   |              |
| HIV-Related Stigma                                 | 0.13 (0.27)                       | -0.39, 0.65  | 0.25 (0.32)                       | -0.38, 0.88  |

**Notes:** Class 1: Mildly Depressed (MiD); Class 2: Moderately Depressed (MoD); Class 3: Seriously Depressed (SiD); 95% CI: 95% confidence interval. Note: all measures assessed at baseline. \*p<0.05; \*\*p<0.01; \*\*\*p<0.001.
